# Supplementary material
Source: PubMed Central journal article supplement (PMC4201982)
Supplement: NIHMS623364-supplement-1.pdf [file NIHMS623364-supplement-1.pdf]

## ELL2 exon 1 loxp insertions

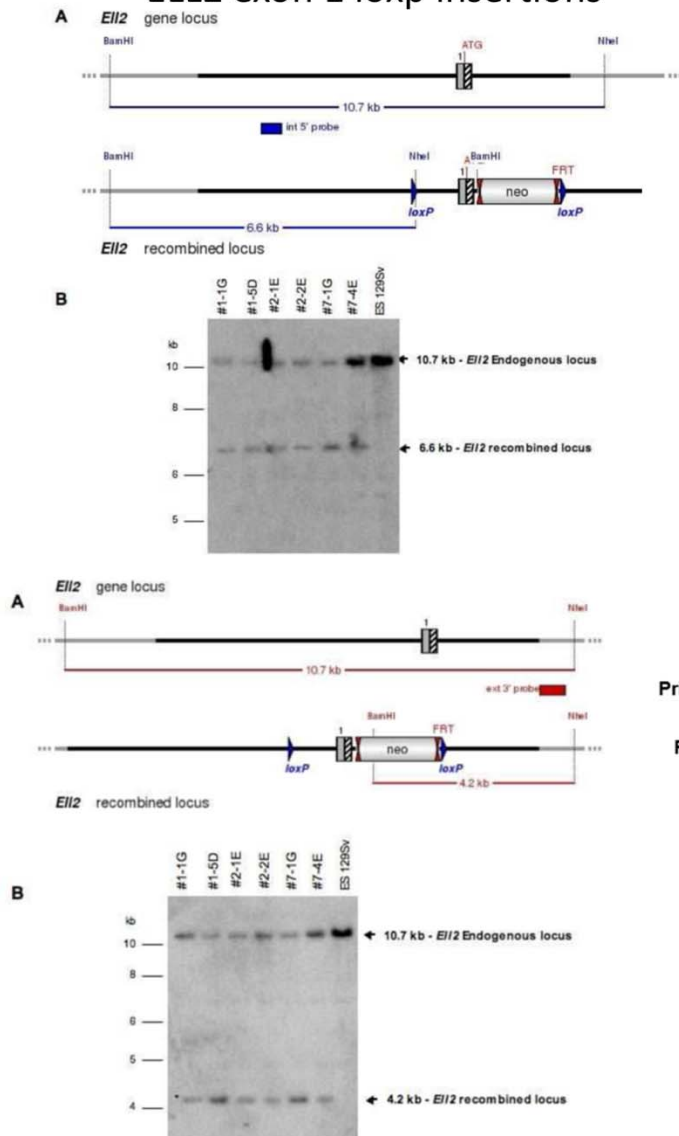

## exon 3 loxp insertions

**A: Homologous recombination.**

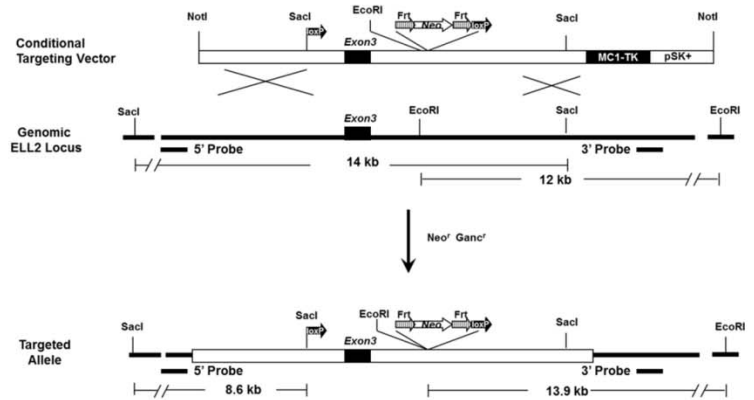

**B: F1 genotyping by PCR.**

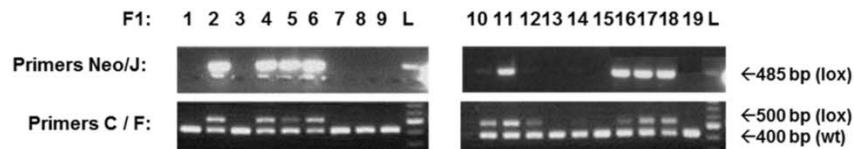

**C: F1 genotyping by Southern blot.**

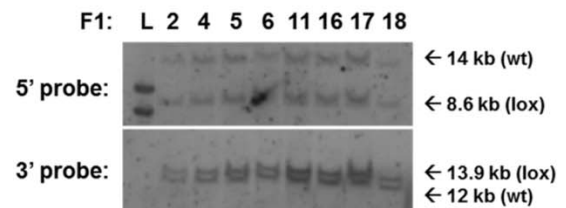

Supp. Figure 1

Supplemental Figure 1. Southern blots of gene insertion in Exon 1 and exon 3

Top left: Southern blot analysis for 5' homologous recombination in ES cells. (A) schematic representation of the wild type ELL2 allele and the recombined allele with the relevant restriction sites for the Southern blot analysis is shown. The strategy for the 5' Southern blot analysis is indicated with a 10.7 kb endogenous ELL2 band plus 6.6 kb recombinant band. (B). the genomic DNA of the tested ES cell clones was compared with wild-type DNA (129SvPas). The digested DNAs were blotted on nylon membrane and hybridized with the 5' probe detecting the BamhH1-NheI fragment to screen for 5' homologous recombination event.

Bottom left: Southern blot analysis for 3' homologous recombination in ES cells. (A) schematic representation of the wild-type ELL2 allele and the recombined allele with the relevant restriction sites for the Southern blot analysis shown. The strategy for the Southern blot detection of the 3' targeting event is indicated with a 10.7 kb ELL2 endogenous band and a 4.2 kb recombinant band. (B) The genomic DNA of the tested ES cell clones was compared with wild-type DNA (129SvPas). The digested DNAs were blotted on nylon membrane and hybridized with the external 3' probe SA-E to screen for the 3' homologous recombination event.

Right panel: Southern blots of loxp gene insertion in Exon 3. (A) homologous recombination between the ELL2-cKO targeting vector and the ELL2 genomic locus. Correctly targeted ES cells have the cKO with 8.6 kb SacI band, in addition to a new 14 kb wild-type band, following hybridization with the 5' probe. These cKO clones also have a 13.9 kb EcoRI-targeted band as well as a 12 kb wild-type (129SvPas) band, following hybridization with the 3' probe as shown in the Southern blot of the F1 hybrids in (C). In (B) PCR showing 485 bp lox band with neo/J primer and 500 bp loxp containing band vs 400 bp wt band with C/F primers.

Supplemental Figure 2. Luciferase transcription assays with IRF4 Blimp-1 and cyclin B2 promoters

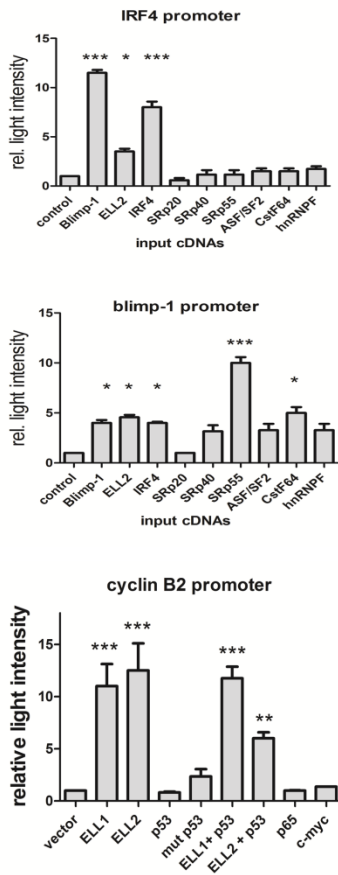

Supplemental Figure 2. Constructs with the (A) IRF4 (-2182 to 0) or (B) Blimp (-2973 to 0) promoters in the pGL4.11 luciferase vector were transfected into 293 T cells along with plasmids encoding the indicated cDNAs. In (C) the mouse cyclin B2 promoter cloned in pGL4.10 was obtained from Dr. Engeland as described in materials and methods. Two days after transfection the cell lysates were prepared and relative light units produced were determined in a luminometer. All transfections were performed at least three times. P values  $\leq 0.05$  is indicated by \*;  $P \leq 0.01$  by \*\*; and  $P \leq 0.001$  by \*\*\*.

Supplemental Table 1. Characterization of B cell subsets

| <b>population</b>  | <b>phenotypic definition</b> |
|--------------------|------------------------------|
| <u>Bone marrow</u> |                              |
| pro-B              | B220+CD43+                   |
| pre-B              | B220+CD43-                   |
| immature B         | B220+IgM+                    |
| recirc B           | B220brightCD43-              |
| <u>Spleen</u>      |                              |
| T1                 | B220+AA4.1+- IgM+CD23        |
| T2                 | B220+AA4.1+IgM+CD23hi CD23hi |
| T3                 | B220+AA4.1+ IgMloCD23-       |
| pPB                | AA4hiB220intCD138-           |
| PC                 | AA4hiB220intCD138+           |
| FO                 | B220+CD21intCD23+            |
| FO Type I          | B220+AA4.1-CD21intIgMloIgDhi |
| FO Type II         | B220+AA4.1-CD21intIgMhiIgDhi |
| MZp                | B220+AA4.1-CD21hiIgMhiCD23hi |
| MZ                 | B220+CD21hiCD23lo            |
| MZ (alt)           | B220+AA4.1-CD21hiIgMhiCD23lo |
| CD4+ T             | CD4+                         |
| CD8+ T             | CD8+                         |

Table 2. Primers used for RT-QPCR

| gene              | Oligo numbers            | sequences                                                                                                   |
|-------------------|--------------------------|-------------------------------------------------------------------------------------------------------------|
| aicda             | 52002573/4               | F: GGGCCAAGGGACGGCATGAG<br>R: CCACGTGGCAGCCAGACTTGT                                                         |
| AFF1/af4          | 78065462/3               | F: AGCGCCCAGGTCCTCCTCAG<br>R: GCTGCTGGCACTTCTGGGGG                                                          |
| ATF6 4458         | 118235982/3              | F: CTGGGCTCGGTAGTTTGTATC<br>R: AGACCTGAATGGCTGCTTAC                                                         |
| ATF6 6076         | 118235984/5              | F: GTGACCTGTAGCTCTGTCATAAG<br>R: GTGGGTAAGGACTACGAGTTTG                                                     |
| Bcl6              | 86298150/1               | F: CATCGTGGTGAGCCGTGAGCA<br>R: CAACTGGTCAGTGAAGATAC                                                         |
| Bcl6 Exon7/8      | 44582739/40              | F: GCAACGAATGTGACTGCCGTTTCT<br>R: CCGATTGAACTGCGCTCCACAAAT                                                  |
| BCMA / tnfrsf17   | 87205307/8               | F: CATGCTTGCAAACCGTGTCA<br>R: CACCGTGTACGTCCCTTTCA                                                          |
| BiP 663           | 118235978/9              | F: CTGTTCCGCTCTACCATGAA<br>R: GAGTAGATCCACCAACCAGAAC                                                        |
| BiP 347           | 118235980/1              | F: CACCTTCGATGTGTCTCTTCTC<br>R: ACCCGCTGATCAAAGTCTTC                                                        |
| Blimp-1 ex6/7/8   | 44582741/2               | F: TTCAAGTGCCAGACCTGCAACAAG<br>R: TCGAAGGTGGGTCTTGAGATTGCT                                                  |
| BRD4 ex5/6        | 48269793/4               | F: TATGCCTGGCCTTTCTACAAGCCT<br>R: ATCAGCACCAAATTCCTGGGCATC                                                  |
| Cdk8 ex12/13      | 50312483/4               | F: GAACCAGGACAGCGGCCACG<br>R: TCCCATGCTGCTCTGGGGCT                                                          |
| c/EBP-beta        | 78433471/2               | F: TGCGCAACCTGGAGACGCAG<br>R: AGGGTGCTGAGCTCTCGCGA                                                          |
| CstF2             | 16083678/9               | F: GATCCTGAGATTGCGCTGAAA<br>R: GGCTGAGGGTTGCCTGAAA                                                          |
| Cyclin B2 (CCNB2) | 90368558/9               | F: CCTCATGGCGCTGCTCCGACG<br>R: CCGCCGGATAGTCACATGGCTCTT                                                     |
| Eaf1              | 78433465/6               | F: CCGGGCAAGTGCAAGGCCAT<br>R: TGCCAACCTGTAGTTCTCCTTCACA                                                     |
| Eaf2 exon 6/7/8   | 44582743/4               | F: GCAACAGCAAATGTGGAATCTGCC<br>R: AGTCCTCACTGTCGCTTTCTGACT                                                  |
| ELL1              | 87855970/1               | F: GGAGTTACGGGTTGTCGTGT<br>R: AGAGATGTGCCCTTGGCTTC                                                          |
| ELL2 ex3/4/5      | 23545157/8               | F: CTGGCCAGGTTACAGTGAGA<br>R: AGCGTCTTTGCTGGAACAC                                                           |
| ELL3              | 85776881/2<br>85776883/4 | F: AGAGCCTCTCAGCTCCATCAGCC<br>R: GCCCAACTCGAGCATGCAG<br>F: AGGGAGGAGAAGCATCGCTGT<br>R: TCACCGGGGAAGATCCGAGC |
| Hif1-alpha        | 88741016/7               | F: TGACGGCGACATGGTTTACA<br>R: ACTGGGCCATTTCTGTGTGT                                                          |
| HPRT              | 16083680/1               | F: CCTAAGATGAGCGCAAGTTGAA                                                                                   |

|                      |                        |                                                                          |
|----------------------|------------------------|--------------------------------------------------------------------------|
|                      |                        | R: CCACAGGACTAGAACACCTGCTAA                                              |
| HSP40                | 88741018/9             | F: TCCCGTCTAAGAGTAAGGAAGACT<br>R: GGTCATTGATCGTCACCTTCC                  |
| Ig kappa C region    | 53279371/2             | F: ACAGACCCTGGCTTAAGGCCCT<br>R: GCCTCTGTATGGCTTCCTTTGGTG                 |
| Igh mu CH4-M1 splice | 42553248/9             | F: TCCGGAGAGACCTATACCTGTGTT<br>R: TTCTCAAAG CCTTCCTCCTCAGCA              |
| Igh mu sec 3'UTR     | 42552350/1             | F: TCTCCCTGATCATGTCTGACACAG<br>R: ATACACAGAGCAACTGGACACCCA               |
| IRE1 3'UT            | 118235972/3            | F: AGGAAAGAGCAGTCCCAATTTA<br>R: ATGTCTGGGTGTGGGTTTAC                     |
| IRF4 ex3/4/5         | 44582745/6             | F: AAGATTGTTCCAGAGGGAGCCAAA<br>R: ATGGGATTTCTGGGTGTGACTGGT               |
| OcaB                 | 78433473/4             | F: TCCTTCCACGTGGGCTTTTATTCCT<br>R: GACCCAGAGACAGCCGGTGA                  |
| P50 of NF-kB         | 86298152/3             | F: GGAGACCGGCAACTCACAGA<br>R: GAAGCTGCCAGTGCTGTCAGG                      |
| P65 relA /NF-kB      | 52002569/70            | F: TACTTTAGCGCGCCGTGGGC<br>R: AGCCTGGGCTGGCTCTGAGG                       |
| Pax5                 | 86298148/9<br>87205309 | F: CGTCAGCTCCATCAACAGG<br>R: CTCACCGATGACACCTGCG<br>R: GTCGTACGCAGTGGCTG |
| PCNA                 | 88741014/5             | F: AGATGCCGTCGGGTGATTT<br>R: ATGGTTACCGCCTCCTCTTC                        |
| Supt5h               | 52002571/2             | F: GGGCTCAAAGCCCCGGGATG<br>R: CCTGCTCATGCCACCTGGGC                       |
| XBP-1 "total"        | 86298154/5             | F: GGCAGCAGGGTCGGAGGCGA<br>R: CCGCTGCCGCTTGCAGCCT                        |
| XBP Ex 2/3           | 44582749/50            | F: GTGTCCATTCCCAAGCGTGTCTT<br>R: TAGAAAGAAAGCCCGGATGAGCGA                |
| XBP-1 spliced        | 93215933<br>117556521  | F: CCTTGTGGTTGAGAACCAGG<br>R: CTGCACCTCGCGGACTCAG                        |
| XBP-1 unspliced      | 93215933<br>117556520  | F: CCTTGTGGTTGAGAACCAGG<br>R: AGGACGTGCACATAGTCTGAGTGC                   |
